# Supplementary material
Source: Springer Nature journal article supplement (https://mijn.bsl.nl/resource/supplementary/13047_2012_481_MOESM1_ESM.pdf/7473930)

Position 1

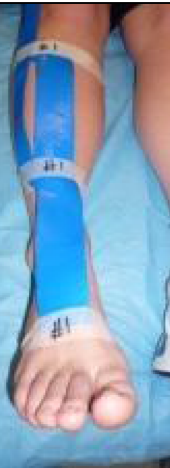

Position 2

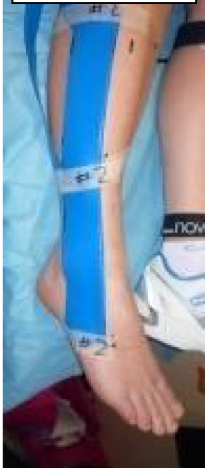

Position 3

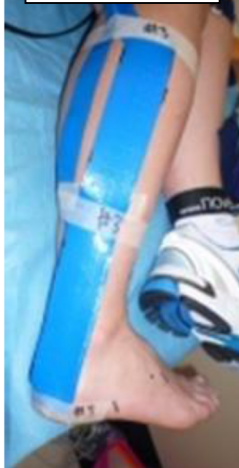

Position 4

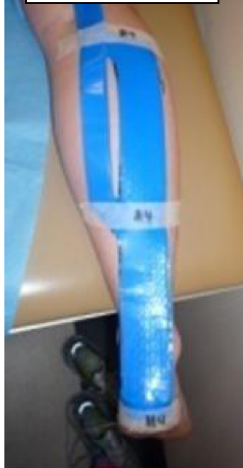

Position 5

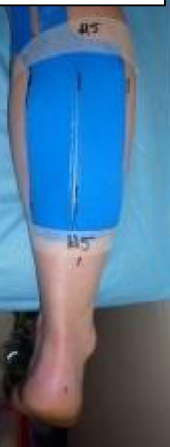

Position 6

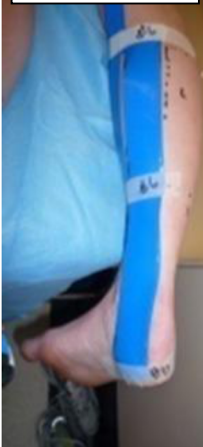

Position 7

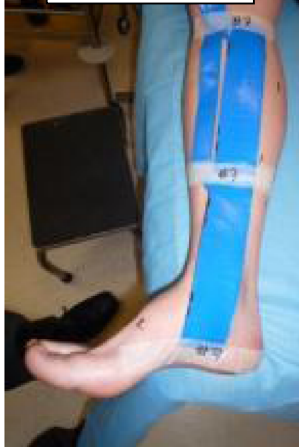

Supplement: MOESM1 [file 7473930]
